# Supplementary material
Source: PubMed Central journal article supplement (PMC5192145)
Supplement: AAC.01563-16_zac001175827s1.pdf [file AAC.01563-16_zac001175827s1.pdf]

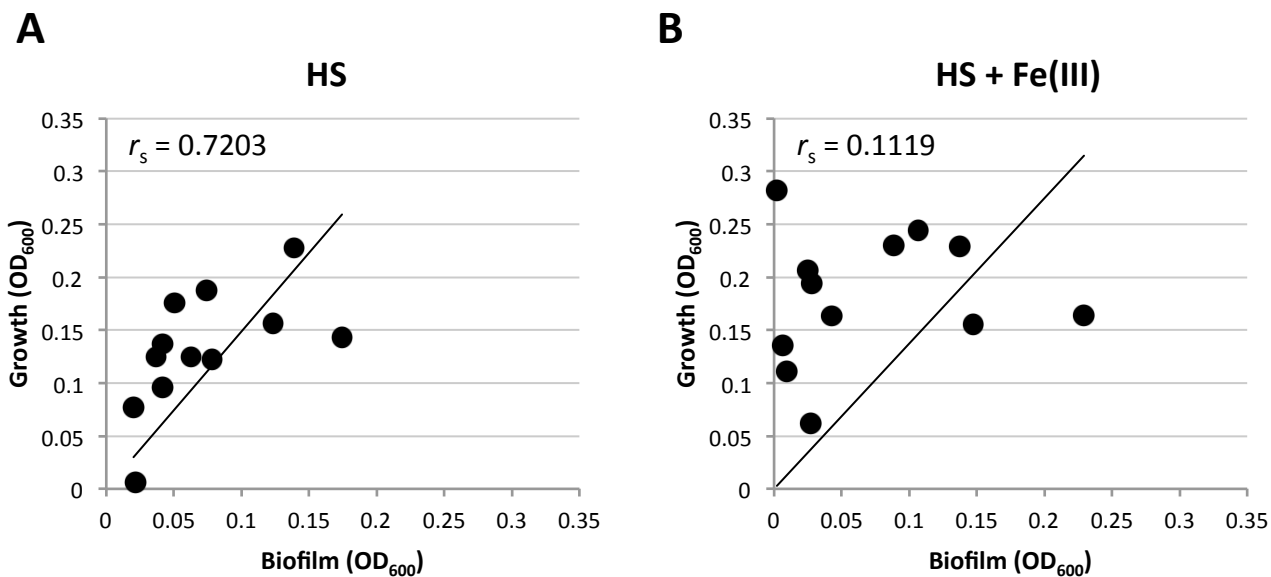

**FIG S1 Relationships between growth and biofilm formation in HS for selected *A. baumannii* clinical isolates.** Correlation analysis between growth and biofilm formation in HS (A), and between growth and biofilm formation in HS supplemented with 100  $\mu\text{M}$   $\text{FeCl}_3$  (B). The Spearman rank correlation coefficients ( $r_s$ ) are indicated. A statistically significant correlation ( $P < 0.05$ ) was observed only for the graph in panel A.

|                                                                                                                 | Biomass ( $\mu\text{m}^3/\mu\text{m}^2$ ) | Average thickness ( $\mu\text{m}$ ) | Surface area ( $\mu\text{m}^2$ ) |
|-----------------------------------------------------------------------------------------------------------------|-------------------------------------------|-------------------------------------|----------------------------------|
| <p>Untreated</p> 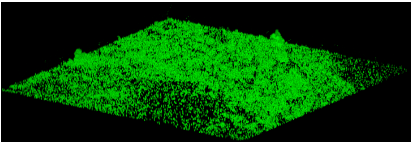               | $8.62 \pm 1.77$                           | $8.34 \pm 2.46$                     | $4,236,008 \pm 111,772$          |
| <p>GaN-treated</p>              | $0.008 \pm 0.003$                         | $2.16 \pm 0.41$                     | $5,539 \pm 1,992$                |
| <p>GaN and Fe(III) treated</p>  | $7.16 \pm 2.31$                           | $7.5 \pm 2.42$                      | $2,990,170 \pm 433,341$          |

**FIG S2 Iron abolishes the ability of GaN to disrupt *A. baumannii* ACICU biofilm in HS.**

Representative confocal microscope images of *A. baumannii* ACICU biofilm developed for 72 h at 37°C in HS (upper image), then treated with 64  $\mu\text{M}$  GaN or with 64  $\mu\text{M}$  GaN and 100  $\mu\text{M}$   $\text{FeCl}_3$  for 72 h at 37°C. Quantification of biofilm spatial characteristics determined by COMSTAT 2.1 analysis. Five image stacks were analyzed *per* condition. Scale bar 50  $\mu\text{m}$ .
